# Supplementary material
Source: ML conference proceedings conference paper supplement (https://openreview.net/forum?id=dnGEPkmnzO)
Supplement: supplementary_material [file attachment]

411 **A Extension to  $k$ -Means and  $(k, p)$ -Clustering**

412 As stated in [20, 8], while [27] only discusses the  $k$ -median problem, their construction can easily  
 413 be modified to work for  $k$ -means clustering and further generalized to work for  $(k, p)$ -clustering,  
 414 where the  $(k, p)$ -clustering problem is defined in the same way as  $k$ -median problem except that we  
 415 want to minimize  $\sum_{x \in U} d(x, S)^p$  for some  $S \subseteq U$  of size at most  $k$ . Note that  $(k, 1)$ -clustering and  
 416  $(k, 2)$ -clustering correspond to  $k$ -median and  $k$ -means respectively.

417 We define a  $\rho$ -metric space  $(U, d)$  in the same way as a metric space except for relaxing the condition  
 418 that  $d$  must satisfy the triangle inequality to the condition that  $d(x, y) \leq \rho(d(x, z) + d(z, y))$  for all  
 419  $x, y, z \in U$ . Given a metric space  $(U, d)$  and some  $p \geq 1$ , the results in Section 6 of [9] can easily be  
 420 used to show that  $(U, d^p)$  is a  $2^{p-1}$ -metric space, where  $d^p(x, y)$  is defined to be  $d(x, y)^p$ .

421 We now show that the assignment  $\sigma$  maintained by our algorithm is  $O(\rho^3)$ -approximate when  $U$  is a  
 422  $\rho$ -metric space (i.e. that  $\text{cost}(\sigma) = O(\rho^3) \cdot \text{opt}(U)$ ) and that the extraction technique of [18] can be  
 423 generalized to  $\rho$ -metric spaces.

424 **Lemma A.1.** *When the underlying space  $U$  is a  $\rho$ -metric space, the assignment  $\sigma$  maintained by our*  
 425 *algorithm is  $O(\rho^3)$ -approximate.*

426 *Proof.* By making the appropriate changes to the proofs of Lemma B.3 and Lemma B.4, we get  
 427 generalizations of these lemmas to  $\rho$ -metric spaces, where the lemma statements are the same except  
 428 for an extra  $\rho$  factor in the inequalities.

429 **Lemma A.2.** *Given any positive  $\xi$ , there exists a sufficiently large choice of  $\alpha$  such that  $v_i \leq$   
 430  $2\rho \cdot \mu_\gamma(U_i^{\text{OLD}})$  for each  $i \in [t-1]$  with probability at least  $1 - e^{-\xi k'}$ .*

431 **Lemma A.3.** *Given metric subspaces  $U_1$  and  $U_2$  of  $U$  such that  $|U_1 \oplus U_2| \leq \epsilon\gamma|U_1|$ , we have that*  
 432  $\mu_\gamma(U_1) \leq 2\rho \cdot \mu_{\gamma^*}(U_2)$ .

433 These two lemmas immediately imply the following generalization of Lemma B.5.

434 **Lemma A.4.**  $v_i \leq 4\rho^2 \cdot \mu_{\gamma^*}(U_i)$  for each  $i \in [t-1]$  with probability at least  $1 - e^{-\xi k'}$ .

435 The upper bound on  $\text{cost}(\sigma)$  given in Lemma B.6 can be generalized by noticing that  $\text{cost}(\sigma, C_i) \leq$   
 436  $2\rho v_i |C_i|$  for all  $i \in [t-1]$ , which us that

$$\text{cost}(\sigma) \leq \sum_{i=1}^t 2\rho v_i |C_i|.$$

437 The lower bound on  $\text{opt}(U)$  given in Lemma B.10 holds for  $\rho$ -metric spaces with no modifications.  
 438 Hence, we get that with probability at least  $1 - e^{-\xi k'}$  we have that

$$\text{cost}(\sigma) \leq \sum_{i=1}^t 2\rho v_i |C_i| \leq \sum_{i=1}^t 8\rho^3 \mu_i |C_i| \leq \frac{16\rho^3 r}{1 - \gamma^*} \text{cost}(S)$$

439 □

440 By making the appropriate modifications to the proof of Theorem C.1, we can extend this theorem to  
 441 work for  $\rho$ -metric spaces. In particular, we can obtain a proof of Theorem A.5 by taking the proof of  
 442 Theorem C.1 and adding extra  $\rho$  factors whenever the triangle inequality is applied.

443 **Theorem A.5.** *Given a  $\phi$ -approximate  $m$ -assignment  $\pi : U \rightarrow U$ , any  $\psi$ -approximate solution*  
 444 *to the weighted  $k$ -median instance  $(\pi(U), d, w)$ , where each point  $x \in \pi(U)$  receives weight*  
 445  *$w(x) := |\pi^{-1}(x)|$ , is also a  $\rho(\phi + 2(1 + \phi)\psi\rho^2)$ -approximate solution to the  $k$ -median instance*  
 446  *$(U, d)$  where  $U$  is a  $\rho$ -metric space.*

447 Since the algorithm in [26] is  $O(1)$ -approximate on  $O(1)$ -metric spaces, it immediately follows by  
 448 applying Theorem A.5 and Lemma A.1 that our algorithm maintains a  $O(1)$ -approximate solution to  
 449 the  $k$ -median problem on  $(U, d^p)$  for  $p = O(1)$ . Since the  $k$ -median problem on  $(U, d^p)$  is exactly  
 450 the  $(k, p)$ -clustering problem on  $(U, d)$ , it follows that our algorithm generalizes to solve instances of  
 451  $(k, p)$ -clustering in metric spaces.

452 **B Proofs of Lemma 3.2 and Lemma 3.3**

453 Throughout this section, we fix  $\gamma$  to be any real such that  $\beta < \gamma < 1$  and  $\epsilon$  to be any real such that  
 454  $0 < \epsilon < \min\{\frac{1-\gamma}{2\gamma}, 1\}$ . Let  $\beta^*$  and  $\gamma^*$  denote  $\beta(1 - \epsilon)$  and  $\gamma(1 + 2\epsilon)$  respectively.

455 **B.1 Proof of Lemma 3.2**

456 We first prove Lemma B.1, which shows that the sizes of the sets  $U_i$  decrease exponentially with  $i$ .

457 **Lemma B.1.** *For all  $i \in [t - 1]$ ,  $|U_{i+1}| \leq (1 - \beta^*)|U_i|$ .*

458 *Proof.* Consider the ratio  $|U_{i+1}|/|U_i|$ . Since  $U_{i+1} \subseteq U_i$  and  $U_{i+1}$  is reconstructed every time  $U_i$  is  
 459 reconstructed, it follows that  $|U_{i+1}|/|U_i|$  is at most  $(n_{i+1} + \ell)/(n_i + \ell - \ell')$ , where  $n_j$  is the size of  
 460  $U_j$  at the time it was last reconstructed and  $\ell$  and  $\ell'$  are the number of insertions and deletions that  
 461 have occurred since the last time  $U_{i+1}$  was reconstructed respectively. By Lemma B.2, we get that  
 462 this expression is upper bounded by  $(n_{i+1} + \tau n_{i+1})/n_i$ . Now we can observe that

$$\frac{|U_{i+1}|}{|U_i|} \leq \frac{n_{i+1} + \ell}{n_i + \ell - \ell'} \leq \frac{n_{i+1} + \tau n_{i+1}}{n_i} \leq \frac{n_{i+1}}{n_i} + \tau \leq (1 - \beta) + \epsilon\beta = 1 - \beta^*,$$

463 where we use the facts that  $n_{i+1} \leq (1 - \beta)n_i$  and  $\tau \leq \epsilon\beta$  in the final inequality.

464 **Lemma B.2.** *Given some integer  $i \in [t - 1]$ , let  $\ell$  and  $\ell'$  be the number of insertions and deletions  
 465 that have occurred since the last time  $U_{i+1}$  was reconstructed respectively. Then we have that*

$$\frac{n_{i+1} + \ell}{n_i + \ell - \ell'} \leq \frac{n_{i+1} + \tau n_{i+1}}{n_i}.$$

466 *Proof.* First, note that  $(n_{i+1} + \ell)/(n_i + \ell - \ell') \leq (n_{i+1} + \ell)/(n_i - \ell')$ . Now, given some reals  $A \geq$   
 467  $a \geq 0$  and  $0 \leq N \leq A - a$ , we define a function  $f : [0, 1] \rightarrow \mathbb{R}$  by  $f(x) = (a + xN)/(A - (1 - x)N)$ .  
 468 The derivative of  $f$  is  $-N(a - A + N)/((x - 1)N + A)^2$  and is non-negative for all  $x \in [0, 1]$ .  
 469 Hence,  $f(x) \leq f(1)$  for all  $x \in [0, 1]$ .

470 By setting  $A = n_i$ ,  $a = n_{i+1}$ ,  $N = \ell + \ell'$  and noting that  $\ell + \ell' \leq \tau n_{i+1}$  by Invariant 3.1 and  
 471  $n_{i+1} \leq (1 - \beta)n_i$ , we get that

$$\ell + \ell' \leq \tau n_{i+1} \leq \beta n_{i+1} = (1 + \beta)n_{i+1} - n_{i+1} \leq (1 + \beta)(1 - \beta)n_i - n_{i+1} \leq n_i - n_{i+1},$$

472 and hence it follows that

$$\frac{n_{i+1} + \ell}{n_i - \ell'} = f\left(\frac{\ell}{\ell + \ell'}\right) \leq f(1) = \frac{n_{i+1} + \ell + \ell'}{n_i} \leq \frac{n_{i+1} + \tau n_{i+1}}{n_i}.$$

473 □

474 □

475 Since  $|U_1| = |U|$ ,  $|U_{t-1}| > (1 - \tau)\alpha k' = \Omega(k)$ , and  $\beta^*$  is a constant, we infer that  $t =$   
 476  $O\left(\log \frac{|U|}{k}\right) = \tilde{O}(1)$ .

477 **B.2 Proof of Lemma 3.3**

478 **Bounding the Radii  $\nu_i$  (Lemma B.5):** Let  $U_i^{\text{OLD}}$  denote the state of the  $i$ th layer the last time it  
 479 was reconstructed for  $i \in [t]$ . We now use the following crucial lemma which is analogous to Lemma  
 480 4.3.3 in [25].

481 **Lemma B.3.** *Given any positive  $\xi$ , there exists a sufficiently large choice of  $\alpha$  such that  $\nu_i \leq$   
 482  $2\mu_\gamma(U_i^{\text{OLD}})$  for each  $i \in [t - 1]$  with probability at least  $1 - e^{-\xi k'}$ .*

483 Henceforth, we fix some positive  $\xi$  and sufficiently large  $\alpha$  such that Lemma B.3 holds.

484 **Lemma B.4.** Given metric subspaces  $U_1$  and  $U_2$  of  $U$  such that  $|U_1 \oplus U_2| \leq \epsilon\gamma|U_1|$ , we have that  
 485  $\mu_\gamma(U_1) \leq 2\mu_{\gamma^*}(U_2)$ .<sup>4</sup>

486 *Proof.* Let  $X$  be a subset of  $U_2$  of size  $k$  such that  $\nu_{\gamma(1+2\epsilon)}(X, U_2) = \mu_{\gamma(1+2\epsilon)}(U_2)$ ,  $\rho =$   
 487  $\mu_{\gamma(1+2\epsilon)}(U_2)$ , and  $A = B_{U_1}(X, \rho)$ . Now note that

$$\begin{aligned} |A| &= |B_{U_1 \cup U_2}(X, \rho) \setminus B_{U_2 \setminus U_1}(X, \rho)| \\ &\geq |B_{U_2}(X, \rho)| - |B_{U_2 \setminus U_1}(X, \rho)| \\ &\geq \gamma(1+2\epsilon)|U_2| - |U_2 \setminus U_1| \\ &\geq \gamma(1+2\epsilon)|U_2| - \epsilon\gamma|U_1| \\ &\geq \gamma(1+2\epsilon)(|U_1| - \epsilon\gamma|U_1|) - \epsilon\gamma|U_1| \\ &= \gamma|U_1| + \epsilon\gamma(1 - \gamma(1+2\epsilon))|U_1| \\ &\geq \gamma|U_1|. \end{aligned}$$

488 Since there also exists a subset  $Y \subseteq A$  of size  $k$  such that  $A \subseteq B_{U_1}(Y, 2\rho)$ , it follows that  
 489  $\nu_\gamma(Y, U_1) \leq 2\rho$ . Hence,  $\mu_\gamma(U_1) \leq \nu_\gamma(Y, U_1) \leq 2\mu_{\gamma(1+2\epsilon)}(U_2)$ .  $\square$

490 **Lemma B.5.**  $\nu_i \leq 4\mu_{\gamma^*}(U_i)$  for each  $i \in [t-1]$  with probability at least  $1 - e^{-\xi k'}$ .

491 *Proof.* For each  $i \in [t-1]$ ,  $|U_i \oplus U_i^{\text{OLD}}| \leq \tau|U_i^{\text{OLD}}|$  since, by Invariant 3.1, at most  $\tau|U_i^{\text{OLD}}|$  points  
 492 have been inserted or deleted from  $U_i$  since it was last reconstructed. Noticing that  $\tau \leq \epsilon\gamma$ , we can  
 493 see that

$$|U_i \oplus U_i^{\text{OLD}}| \leq \epsilon\gamma|U_i^{\text{OLD}}|.$$

494 By now applying Lemma B.4 it follows that  $\mu_\gamma(U_i^{\text{OLD}}) \leq 2\mu_{\gamma^*}(U_i)$ . The lemma follows by combin-  
 495 ing this result with Lemma B.3.  $\square$

496 **Upper Bounding  $\text{cost}(\sigma)$  (Lemma B.6):**

**Lemma B.6.**

$$\text{cost}(\sigma) \leq \sum_{i=1}^t 2\nu_i|C_i|.$$

497 *Proof.* We first note that for all  $i \in [t-1]$ ,  $\text{cost}(\sigma, C_i) \leq 2\nu_i|C_i|$ . This follows directly from the  
 498 fact that each point  $x$  in  $C_i$  is assigned to some point  $y \in C_i$  such that  $d(x, y) \leq 2\nu_i$ . Since the  $C_i$   
 499 partition  $U$  and  $\text{cost}(\sigma, C_t) = 0$ , we get:

$$\text{cost}(\sigma) = \sum_{i=1}^t \text{cost}(\sigma, C_i) \leq \sum_{i=1}^t 2\nu_i|C_i|.$$

500  $\square$

501 **Lower Bounding  $\text{opt}(U)$  (Lemma B.10):** Let  $r$  denote  $\lceil \log_{1-\beta^*} \frac{1-\gamma^*}{3} \rceil$  and for each  $i \in [t]$  let  
 502  $\mu_i$  denote  $\mu_{\gamma^*}(U_i)$ .

503 For the rest of this subsection we fix an arbitrary  $S \subseteq U$  of size  $k$ . For each  $i \in [t]$ , let  $F_i$  denote  
 504 the set  $\{x \in U_i \mid d(x, S) \geq \mu_i\}$ , and for any integer  $m > 0$ , let  $F_i^m$  denote  $F_i \setminus (\cup_{j>0} F_{i+jm})$  and  
 505  $G_{i,m}$  denote the set of all integers  $j \in [t]$  and  $j \equiv i \pmod{m}$ .

506 **Lemma B.7.** Given some  $i \in [t]$  and a subset  $X \subseteq F_i$ , we have that  $|F_i| \geq (1 - \gamma^*)|U_i|$  and  
 507  $\text{cost}(S, X) \geq \mu_i|X|$ .

508 *Proof.* It follows directly from the definition of  $\mu_i$  that we have that  $|F_i| \geq (1 - \gamma^*)|U_i|$ . By the  
 509 definition of  $F_i$ , we have that  $\text{cost}(S, X) = \sum_{x \in X} d(x, S) \geq \mu_i|X|$ .  $\square$

510 The following lemma is proven in [25].

<sup>4</sup> $\oplus$  denotes symmetric difference, i.e.  $U_1 \oplus U_2 = (U_1 \setminus U_2) \cup (U_2 \setminus U_1)$ .

511 **Lemma B.8** ([25], Lemma 4.3.8). *Given integers  $\ell \in [t]$  and  $m > 0$ , we have that*

$$\text{cost}(S, \cup_{i \in G_{\ell, m}} F_i^m) \geq \sum_{i \in G_{\ell, m}} \mu_i |F_i^m|.$$

512 **Lemma B.9.** *For all  $i \in [t-1]$ , we have that  $|F_i^r| \geq \frac{1}{2}|F_i|$ .*

513 *Proof.* We first note that for all  $i \in [t-r]$ , we have that  $|F_{i+r}| \leq \frac{1}{3}|F_i|$ . This follows from the fact  
514 that

$$|F_{i+r}| \leq |U_{i+r}| \leq (1 - \beta^*)^r |U_i| \leq \frac{(1 - \beta^*)^r}{1 - \gamma^*} |F_i| \leq \frac{1}{3} |F_i|,$$

515 where the first inequality follows from the fact that  $F_{i+r} \subseteq U_{i+r}$ , the second inequality follows from  
516 Lemma B.1, the third inequality follows from Lemma B.7, and the fourth inequality follows from the  
517 definition of  $r$ . We now get that

$$|F_i^r| = |F_i \setminus \cup_{j>0} F_{i+jr}| \geq |F_i| - \sum_{j>0} \frac{1}{3^j} |F_i| \geq \frac{1}{2} |F_i|.$$

518 □

**Lemma B.10.**

$$\text{cost}(S) \geq \frac{1 - \gamma^*}{2r} \sum_{i=1}^t \mu_i |C_i|.$$

519 *Proof.* Let  $\ell = \arg \max_{0 \leq \ell < r} \{\sum_{i \in G_{\ell, r}} \mu_i |F_i^r|\}$ . Then we have that

$$\begin{aligned} \text{cost}(S) &\geq \text{cost}(S, \cup_{i \in G_{\ell, r}} F_i^r) \geq \sum_{i \in G_{\ell, r}} \mu_i |F_i^r| \geq \frac{1}{r} \sum_{i=1}^t \mu_i |F_i^r| \geq \frac{1}{2r} \sum_{i=1}^t \mu_i |F_i| \\ &\geq \frac{1 - \gamma^*}{2r} \sum_{i=1}^t \mu_i |U_i| \geq \frac{1 - \gamma^*}{2r} \sum_{i=1}^t \mu_i |C_i|. \end{aligned}$$

520 The second inequality follows from Lemma B.8, the third inequality from averaging and the choice  
521 of  $\ell$ , the fourth inequality from Lemma B.9, and the fifth inequality from Lemma B.7. □

522 **Proof of Lemma 3.3:** It follows that with probability at least  $1 - e^{-\xi k'}$  we have that

$$\text{cost}(\sigma) \leq \sum_{i=1}^t 2\nu_i |C_i| \leq \sum_{i=1}^t 8\mu_i |C_i| \leq \frac{16r}{1 - \gamma^*} \text{cost}(S)$$

523 for any set  $S \subseteq U$  of size  $k$ . Hence, we have that

$$\text{cost}(\sigma) \leq \frac{16r}{1 - \gamma^*} \text{opt}(U).$$

## 524 C Proof of Corollary 3.4

525 In order to prove this corollary, we apply the extraction technique presented in [27] (with full details  
526 appearing in [25]) which is a slight generalization of the techniques from [18]. In particular, we  
527 use the following theorem which follows as an immediate corollary of Theorem 6 in [25]. For  
528 completeness, we provide a proof of this theorem.

529 **Theorem C.1.** *Given a  $\phi$ -approximate  $m$ -assignment  $\pi : U \rightarrow U$ , any  $\psi$ -approximate solution  
530 to the weighted  $k$ -median instance  $(\pi(U), d, w)$ , where each point  $x \in \pi(U)$  receives weight  
531  $w(x) := |\pi^{-1}(x)|$ , is also a  $(\phi + 2(1 + \phi)\psi)$ -approximate solution to the  $k$ -median instance  $(U, d)$ .*

532 *Proof.* Let  $S^*$  be a solution to the weighted  $k$ -median instance  $(\pi(U), d, w)$  and let  $S$  be an optimal  
533 solution to the  $k$ -median instance  $(U, d)$ . Let  $\phi$  and  $\psi$  be constants such that  $\text{cost}(\pi, U) \leq \phi \cdot \text{opt}(U)$   
534 and  $\text{cost}_w(S^*, \pi(U)) \leq \psi \cdot \text{opt}_w(\pi(U))$ . We now show that  $\text{cost}(S^*, U) = O(1) \cdot \text{opt}(U)$ . We  
535 first note that

$$\begin{aligned} \text{cost}(S^*, U) &= \sum_{x \in U} d(x, S^*) \\ &\leq \sum_{x \in U} d(x, \pi(x)) + \sum_{y \in \pi(U)} w(y) \cdot d(y, S^*) \\ &= \text{cost}(\pi, U) + \text{cost}_w(S^*, \pi(U)) \\ &\leq \phi \cdot \text{opt}(U) + \text{cost}_w(S^*, \pi(U)). \end{aligned}$$

536 Now note that, for any  $X \subseteq U$  of size at most  $k$ , there exists some  $Y \subseteq \pi(U)$  of size at most  $k$  such  
537 that  $\text{cost}_w(Y, \pi(U)) \leq 2 \cdot \text{cost}_w(X, \pi(U))$ . Since  $\text{cost}_w(S^*, \pi(U)) \leq \psi \cdot \text{cost}_w(Y, \pi(U))$  for  
538 all  $Y \subseteq \pi(U)$  of size at most  $k$ , we get the following.

$$\begin{aligned} \text{cost}_w(S^*, \pi(U)) &\leq 2\psi \cdot \text{cost}_w(S, \pi(U)) \\ &= 2\psi \cdot \sum_{y \in \pi(U)} w(y) \cdot d(y, S) \\ &= 2\psi \cdot \sum_{x \in U} d(\pi(x), S) \\ &\leq 2\psi \cdot \sum_{x \in U} d(x, \pi(x)) + 2\psi \cdot \sum_{x \in U} d(x, S) \\ &= 2\psi \cdot \text{cost}(\pi, U) + 2\psi \cdot \text{opt}(U) \\ &\leq 2(1 + \phi)\psi \cdot \text{opt}(U). \end{aligned}$$

539 By combining these two chains of inequalities, we get that

$$\text{cost}(S^*, U) \leq \phi \cdot \text{opt}(U) + \text{cost}_w(S^*, \pi(U)) \leq (\phi + 2(1 + \phi)\psi) \cdot \text{opt}(U).$$

540

□

541 It immediately follows that we can get a  $O(1)$ -approximate solution to the instance  $(U, d)$  by running  
542 a static weighted  $k$ -median algorithm on the instance  $(\sigma(U), d, w)$ .

## 543 **D Lower Bounds on Update and Query Time**

544 In the static (i.e. non-dynamic) setting, the  $k$ -median problem is defined as follows: given a metric  
545 space  $U$ , return a set  $S$  of at most  $k$  points from  $U$  which minimizes the value of  $\sum_{x \in S} d(x, S)$ . The  
546 following lower bound for the static  $k$ -median problem is proven by Mettu in [25].

547 **Theorem D.1.** *Any  $O(1)$ -approximate randomized (static) algorithm for the  $k$ -median problem,  
548 which succeeds with even negligible probability, runs in time  $\Omega(nk)$ .*

549 Informally, the proof of this lower bound is obtained by constructing, for each  $\delta > 0$ , an input  
550 distribution of metric spaces (with polynomially bounded aspect ratio) on which no deterministic  
551 algorithm for the  $k$ -median problem succeeds with probability more than  $\delta$ . Theorem D.1 then  
552 follows by an application of Yao's minmax principle.

553 We can use this lower bound from the static setting in order to get a lower bound for the dynamic  
554 setting. First note that any incremental algorithm for  $k$ -median with amortized update time  $u(n, k)$   
555 and query time  $q(n, k)$  can be used to construct a static algorithm for the  $k$ -median problem with  
556 running time  $n \cdot u(n, k) + q(n, k)$  by inserting each point in the input metric space  $U$  followed by  
557 a solution query. Hence, by Theorem D.1, we must have that  $n \cdot u(n, k) + q(n, k) = \Omega(nk)$ . Now  
558 assume that some incremental algorithm for  $k$ -median has query time  $\tilde{O}(\text{poly}(k))$ . If this algorithm  
559 also has an amortized update time of  $\tilde{o}(k)$ , then for the range of values of  $k$  where  $q(n, k) = \tilde{o}(nk)$ ,  
560 it follows that  $\tilde{o}(nk)$  is  $\Omega(nk)$ , giving a contradiction. Hence, the amortized update time must be  
561  $\tilde{\Omega}(k)$  and Theorem D.2 follows.

562 **Theorem D.2.** Any  $O(1)$ -approximate incremental algorithm for the  $k$ -median problem with  
 563  $\tilde{O}(\text{poly}(k))$  query time must have  $\tilde{\Omega}(k)$  amortized update time.

564 It follows that the update time of our algorithm is optimal up to polylogarithmic factors.

565 **E Omitted experimental results.**

566 **E.1 Update time evaluation.**

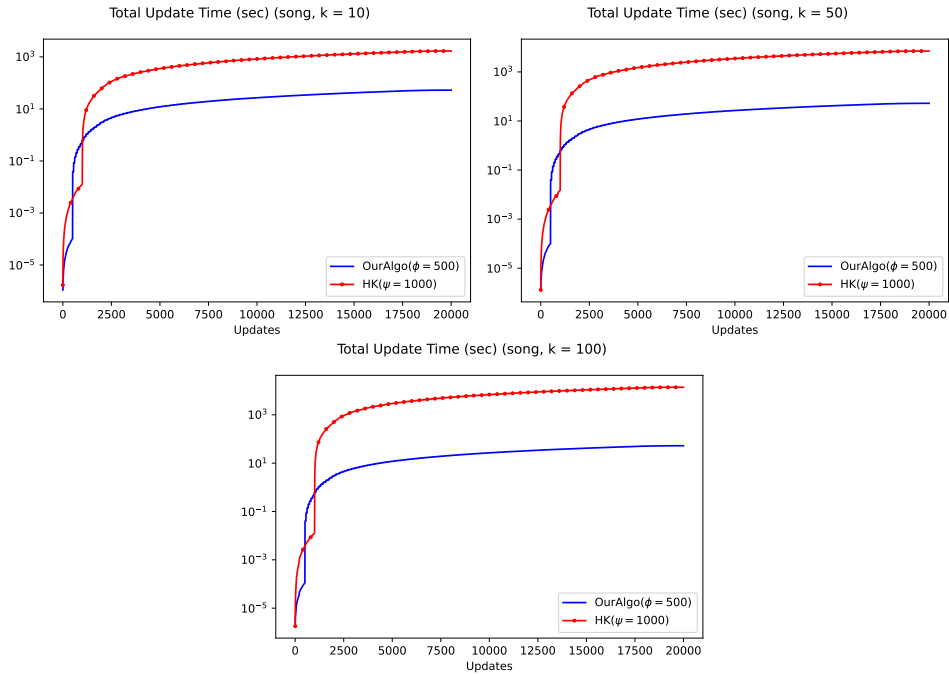

Figure 2: The cumulative update time for the different algorithms, on the Song dataset for  $k = 10$  (top left),  $k = 50$  (top right),  $k = 100$  (bottom).

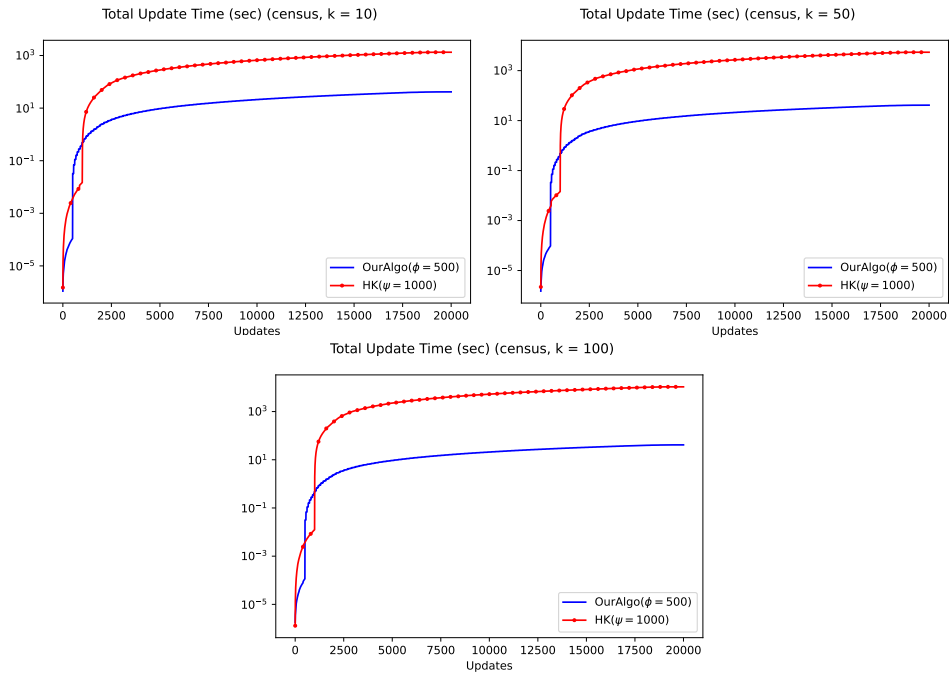

Figure 3: The cumulative update time for the different algorithms, on the Census dataset for  $k = 10$  (top left),  $k = 50$  (top right),  $k = 100$  (bottom).

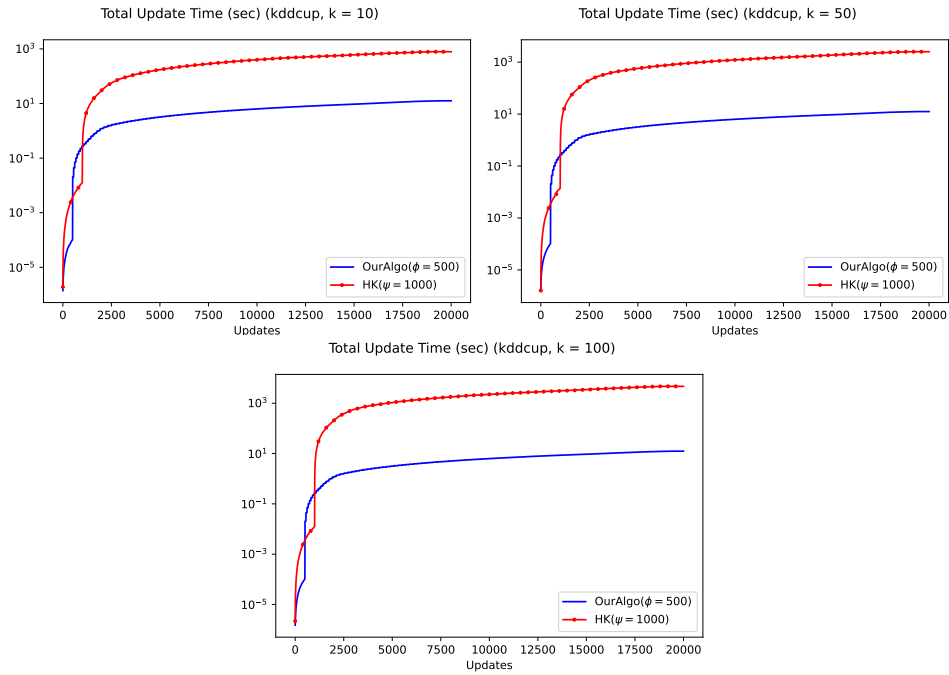

Figure 4: The cumulative update time for the different algorithms, on the KDD-Cup dataset for  $k = 10$  (top left),  $k = 50$  (top right),  $k = 100$  (bottom).

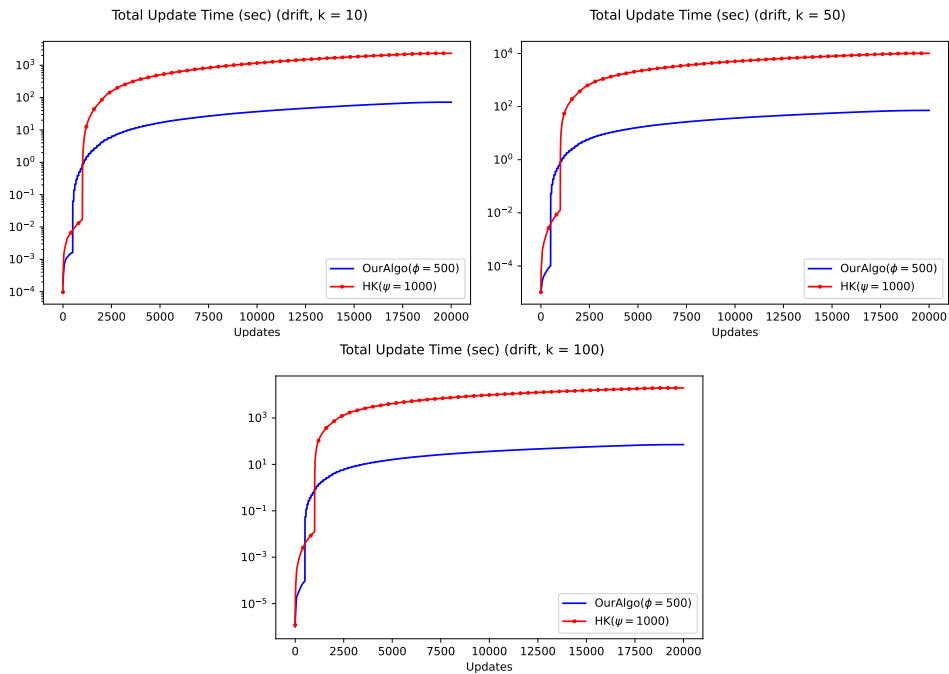

Figure 5: The cumulative update time for the different algorithms, on the Drift dataset for  $k = 10$  (top left),  $k = 50$  (top right),  $k = 100$  (bottom).

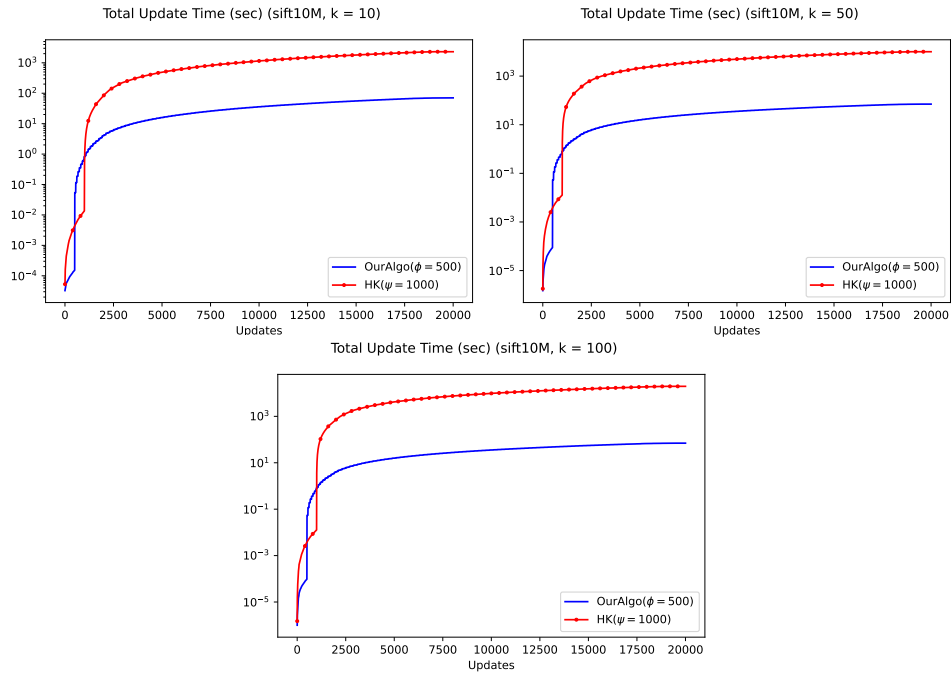

Figure 6: The cumulative update time for the different algorithms, on the SIFT10M dataset for  $k = 10$  (top left),  $k = 50$  (top right),  $k = 100$  (bottom).

567 **E.2 Solution cost evaluation.**

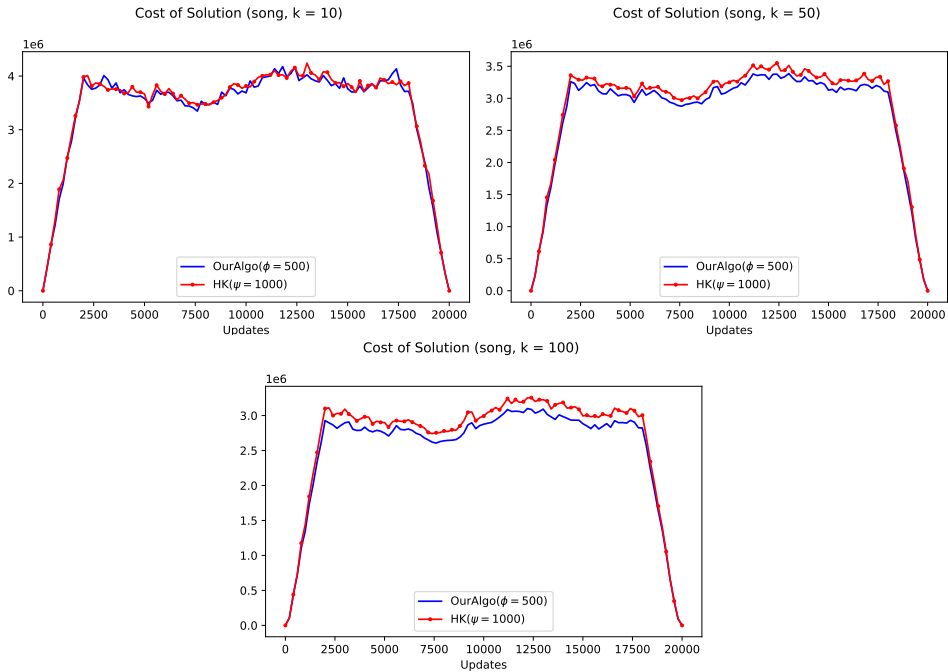

Figure 7: The solution cost by the different algorithms, on Song for  $k = 10$  (top left),  $k = 50$  (top right),  $k = 100$  (bottom).



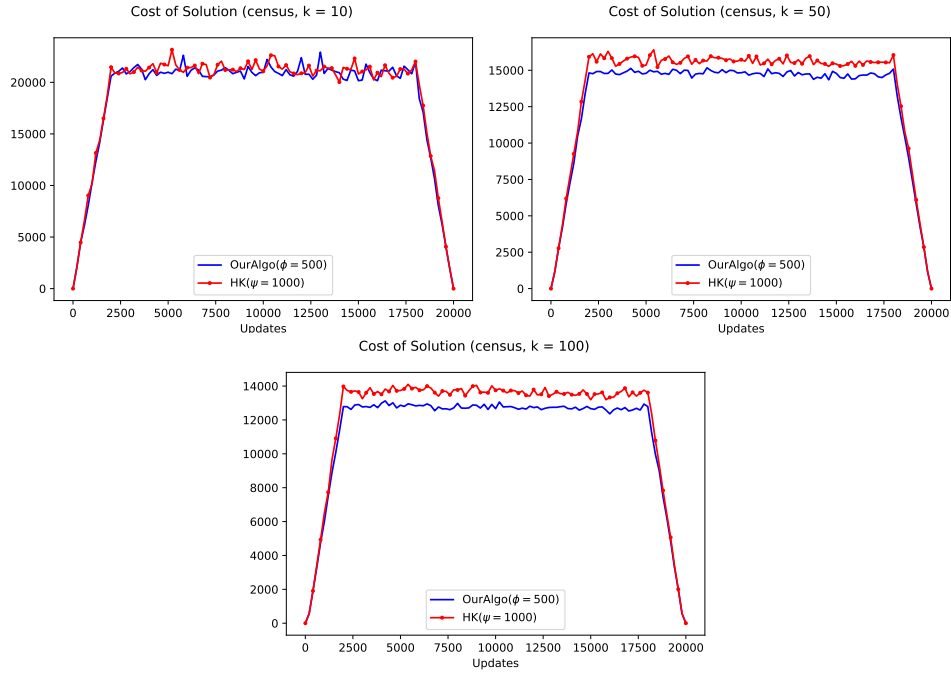

Figure 8: The solution cost by the different algorithms, on Census for  $k = 10$  (top left),  $k = 50$  (top right),  $k = 100$  (bottom).

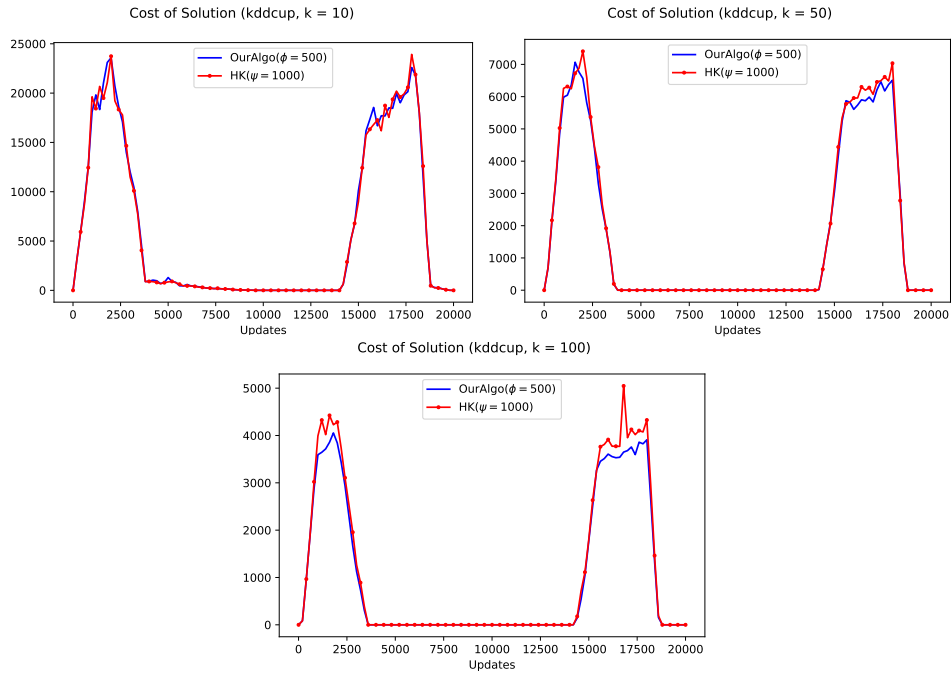

Figure 9: The solution cost by the different algorithms, on KDD-Cup for  $k = 10$  (top left),  $k = 50$  (top right),  $k = 100$  (bottom).

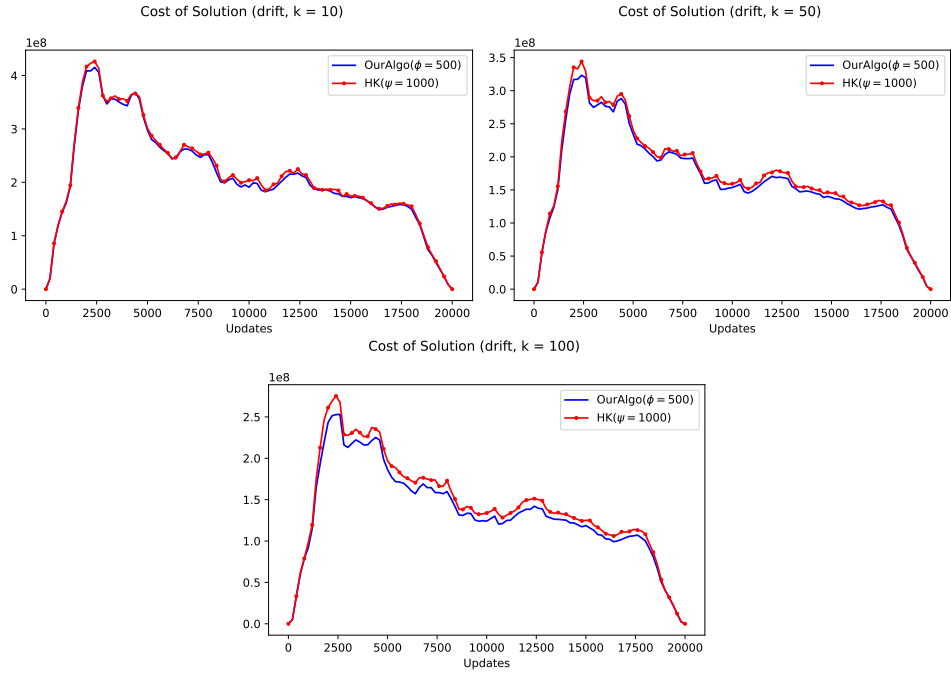

Figure 10: The solution cost by the different algorithms, on Drift for  $k = 10$  (top left),  $k = 50$  (top right),  $k = 100$  (bottom).

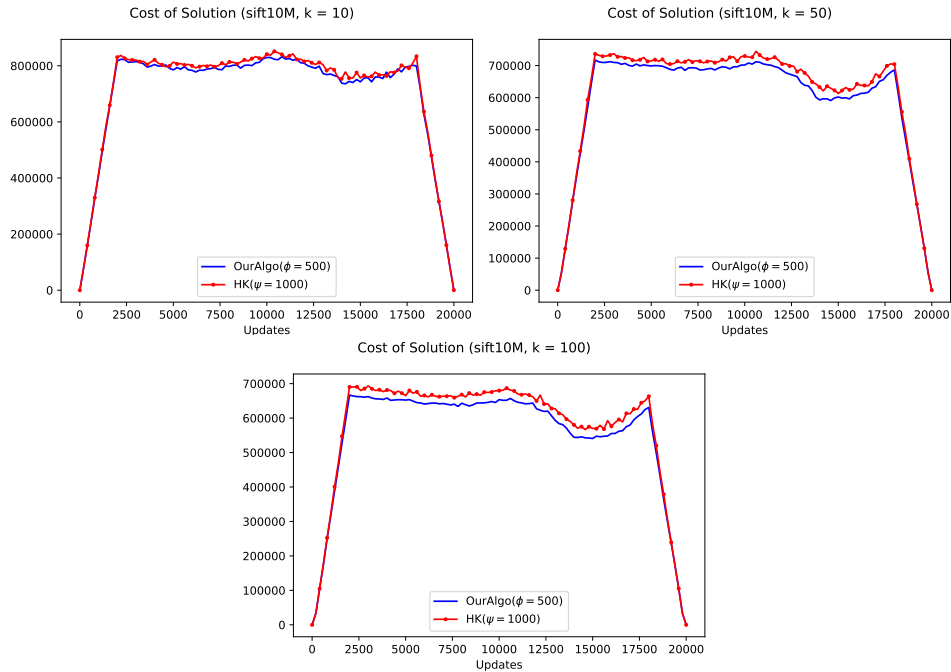

Figure 11: The solution cost by the different algorithms, on SIFT10M for  $k = 10$  (top left),  $k = 50$  (top right),  $k = 100$  (bottom).

568 **E.3 Query time evaluation**

Table 4: The average query times for the algorithm  $\text{OURALG}(\phi = 500)$  and  $\text{HK}(\psi = 1000)$  (we omit the parameter value from the table to simplify the presentation), on the different datasets that we consider and for  $k \in \{10, 50, 100\}$ .

|           | Song   |       | Census |       | KDD-Cup |       | Drift  |       | SIFT10M |       |
|-----------|--------|-------|--------|-------|---------|-------|--------|-------|---------|-------|
|           | OURALG | HK    | OURALG | HK    | OURALG  | HK    | OURALG | HK    | OURALG  | HK    |
| $k = 10$  | 0.569  | 0.327 | 0.478  | 0.280 | 0.069   | 0.176 | 0.729  | 0.421 | 0.732   | 0.419 |
| $k = 50$  | 0.610  | 0.347 | 0.511  | 0.295 | 0.075   | 0.141 | 0.784  | 0.447 | 0.795   | 0.448 |
| $k = 100$ | 0.665  | 0.373 | 0.552  | 0.317 | 0.085   | 0.131 | 0.857  | 0.483 | 0.866   | 0.483 |

569 **E.4 Parameter tuning.**

570 **E.4.1 Update time.**

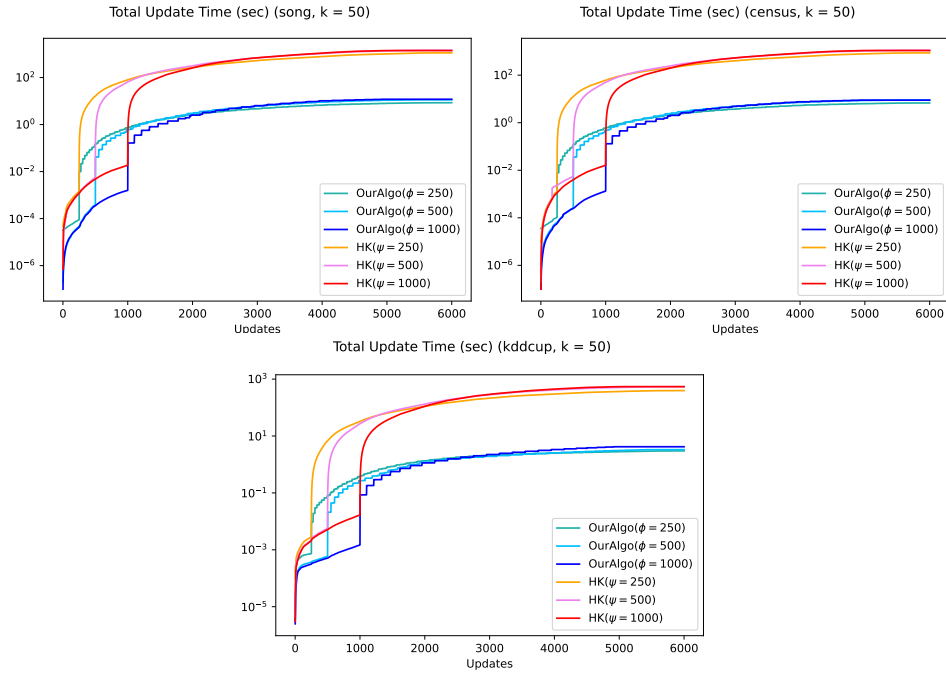

Figure 12: The cumulative update time for different parameters of  $\text{OURALG}$  and  $\text{HK}$ , for  $k = 50$ , on datasets Song (top left), Census (top right), and KDD-Cup (bottom).

571 **E.4.2 Solution cost.**

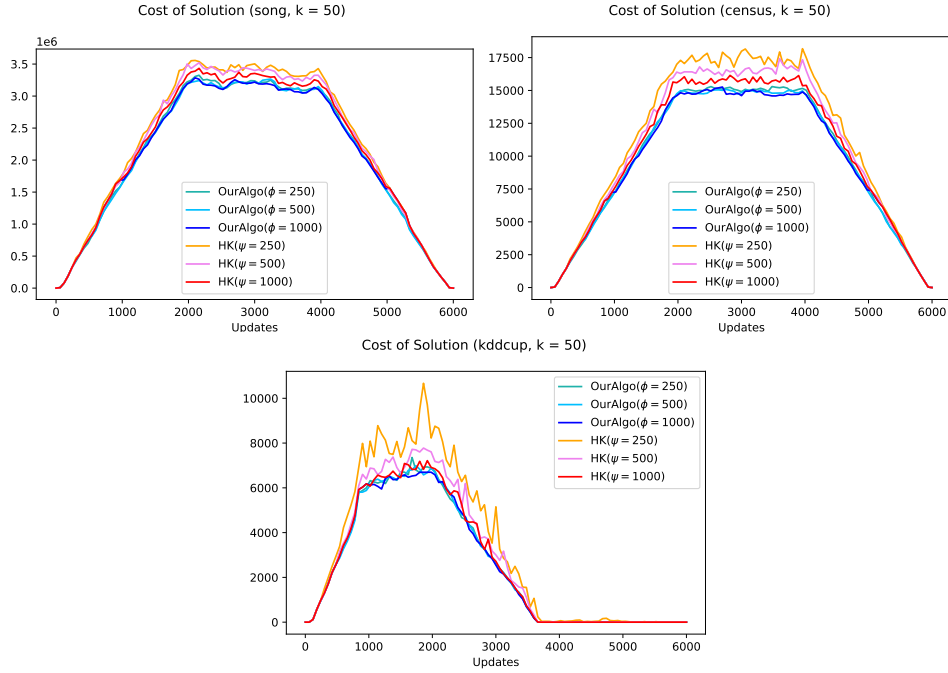

Figure 13: The solution cost for different parameters of OURALG and HK, for  $k = 50$ , on datasets Song (top left), Census (top right), and KDD-Cup (bottom).

572 **E.4.3 Query time.**

Table 5: The average query times for the algorithm OURALG and HK with different parameters, on the different datasets for  $k = 50$ .

|                         | Song  | Census | KDD-Cup |
|-------------------------|-------|--------|---------|
| HK( $\psi = 250$ )      | 0.026 | 0.021  | 0.012   |
| HK( $\psi = 500$ )      | 0.087 | 0.073  | 0.043   |
| HK( $\psi = 1000$ )     | 0.293 | 0.249  | 0.156   |
| OURALG( $\phi = 250$ )  | 0.223 | 0.187  | 0.054   |
| OURALG( $\phi = 500$ )  | 0.439 | 0.364  | 0.086   |
| OURALG( $\phi = 1000$ ) | 0.719 | 0.605  | 0.146   |

573 **E.5 Randomized order of updates.**

574 **E.5.1 Update time.**

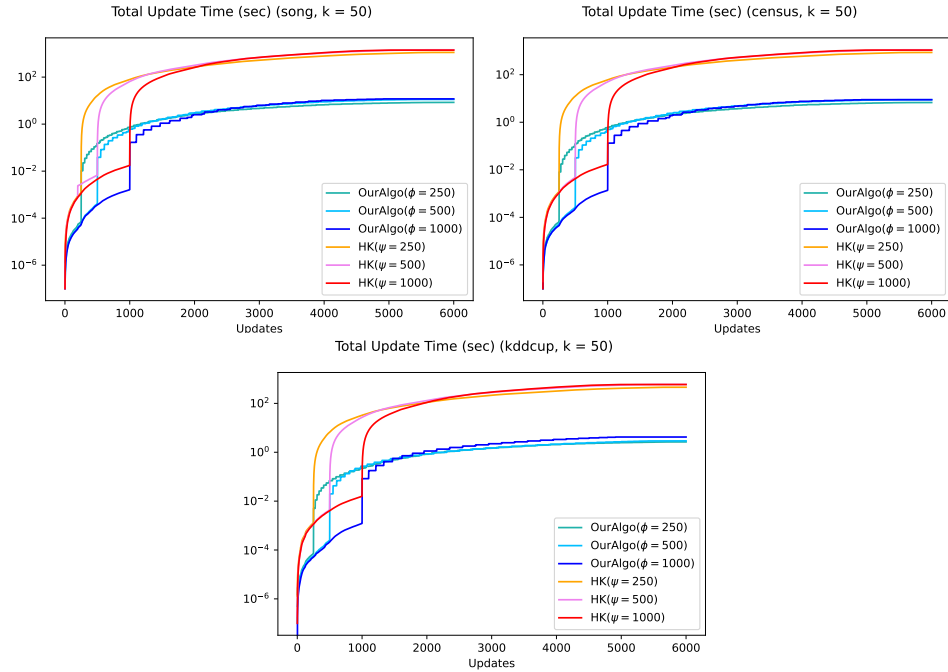

Figure 14: The cumulative update time for different parameters of OURALG and HK, for  $k = 50$ , over a sequence of updates given by a randomized order of the points in the dataset, on the datasets Song (top left), Census (top right), and KDD-Cup (bottom).

575

576 **E.5.2 Solution cost.**

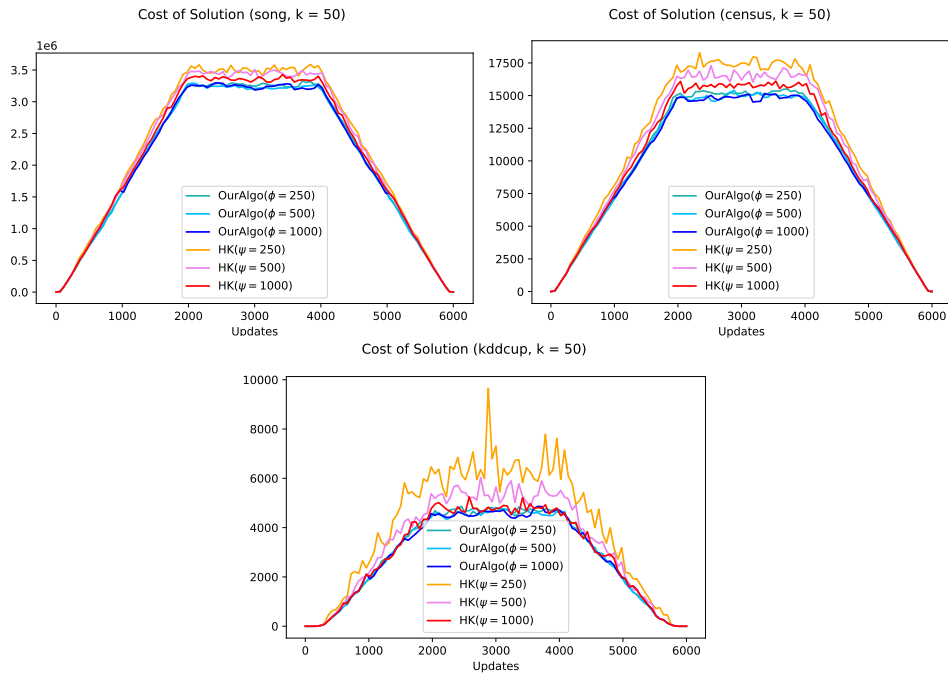

Figure 15: The solution cost for different parameters of OURALG and HK, for  $k = 50$ , over a sequence of updates given by a randomized order of the points in the dataset, on the datasets Song (top left), Census (top right), and KDD-Cup (bottom).

577 **E.5.3 Query time.**

Table 6: The average query times for the algorithm OURALG and HK with different parameters, for  $k = 50$ , over a sequence of updates given by a randomized order of the points in each of the datasets that we consider.

|                         | Song  | Census | KDD-Cup |
|-------------------------|-------|--------|---------|
| HK( $\psi = 250$ )      | 0.025 | 0.021  | 0.014   |
| HK( $\psi = 500$ )      | 0.086 | 0.073  | 0.050   |
| HK( $\psi = 1000$ )     | 0.292 | 0.247  | 0.173   |
| OURALG( $\phi = 250$ )  | 0.225 | 0.185  | 0.062   |
| OURALG( $\phi = 500$ )  | 0.440 | 0.364  | 0.100   |
| OURALG( $\phi = 1000$ ) | 0.723 | 0.605  | 0.165   |

578 **E.6 Larger experiment.**

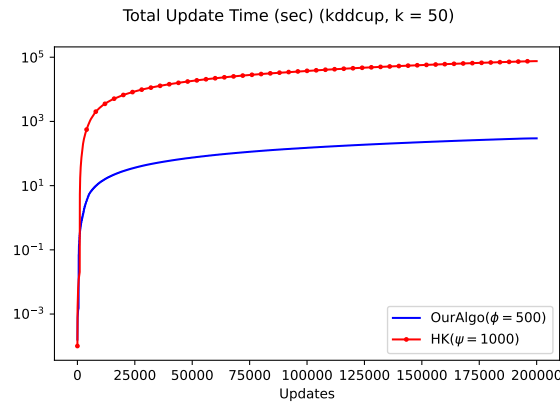

Figure 16: The total update time for OURALG( $\phi = 500$ ) and HK( $\psi = 1000$ ), on the larger instance derived from KDD-Cup, for  $k = 50$ .

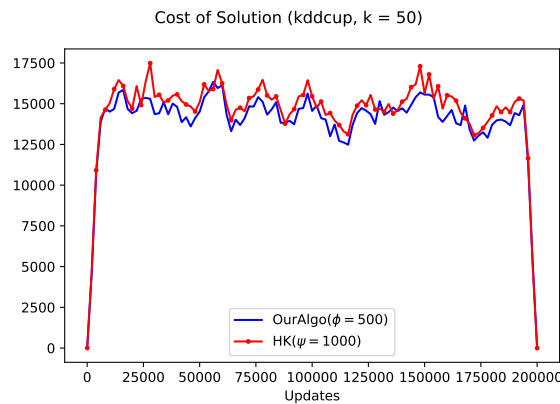

Figure 17: The solution cost produced by OURALG( $\phi = 500$ ) and HK( $\psi = 1000$ ) two algorithms, on the larger instance derived from KDD-Cup, for  $k = 50$ .

579 The average query times for OURALG( $\phi = 500$ ) and HK( $\psi = 1000$ ) while handling this longer  
 580 sequence of updates were 0.416 and 0.225 respectively.
